# Supplementary material for: STAT1 Is Required for Redifferentiation during Madin-Darby Canine Kidney Tubulogenesis
Source: PubMed Central journal article supplement — Mol Biol Cell. 2010 Nov 15;21(22):3926–33. doi: 10.1091/mbc.E10-02-0112 (PMC2982126; doi:10.1091/mbc.e10-02-0112), 2010-11-15
Supplement: E10-02-0112_1.pdf [file E10-02-0112_1.pdf]

# Supplementary Fig.1

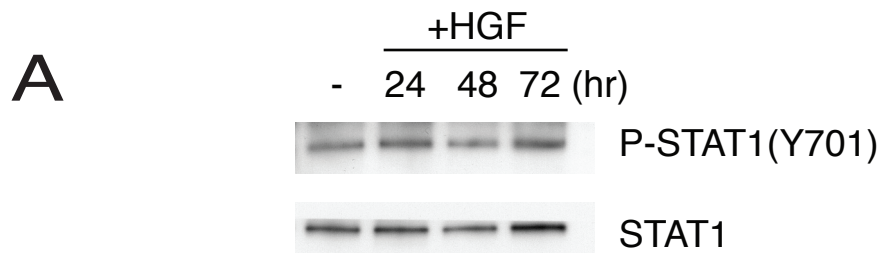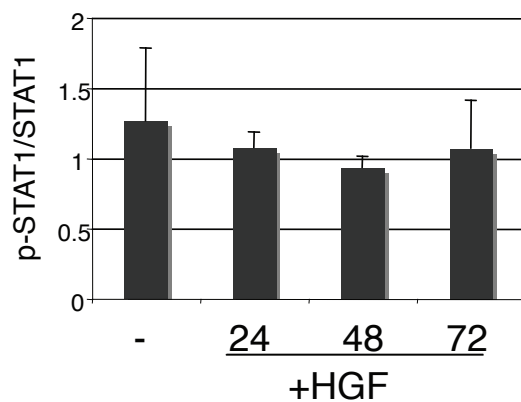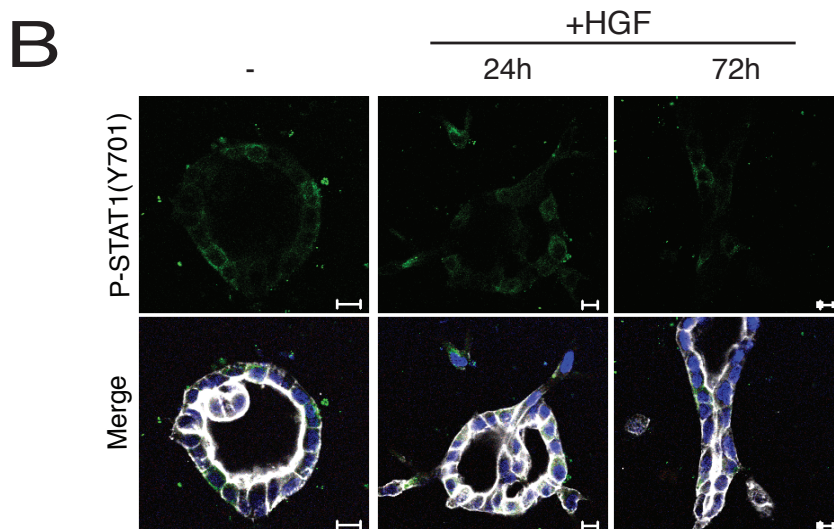

Figure S1. STAT1 activity is not up-regulated in response to HGF at the specific time points of tubulogenesis.

(A) Lysates from MDCK cysts were immunoprecipitated with the antibody against STAT1 and then analysed by immunoblotting with either phospho-STAT1 Y701 or total-STAT1. (B) MDCK cysts were treated with HGF and then immunostained with p-STAT1(Y701) (green), phalloidin (white), total-STAT1 (red), and Hoechst (blue).

## Supplementary Fig.2

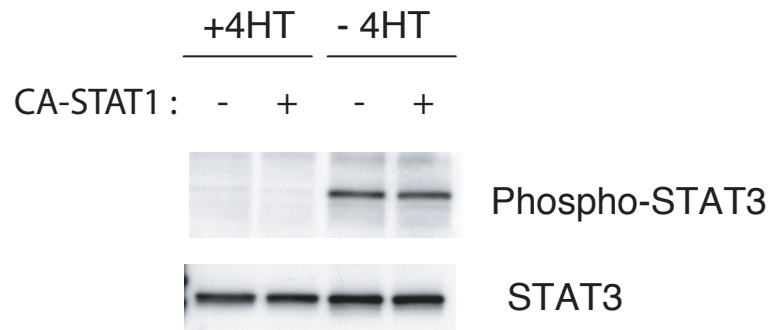

Figure S2. CA-STAT1 overexpression does not change the STAT3 activation. Raf:ER cysts (lane 1 and 3) and Raf:ER cysts overexpressing CA-STAT1 were treated or not with 4HT for 48 h. Activation of STAT3 was detected by immunoblotting with specific antibodies against total STAT3 or phospho-STAT3 Tyr705.
